# Supplementary material for: Enhanced Antioxidant and Neuroprotective Properties of Pterostilbene (Resveratrol Derivative) in Amorphous Solid Dispersions
Source: MDPI journal article supplement (doi:10.3390/ijms25052774), 2024-02-28
Supplement: s1 [file s1]

# Enhanced Antioxidant and Neuroprotective Properties of Pterostilbene (Resveratrol Derivative) in Amorphous Solid Dispersions

Natalia Rosiak <sup>1</sup>, Ewa Tykarska <sup>2</sup> and Judyta Cielecka-Piontek <sup>1,\*</sup>

<sup>1</sup> Department of Pharmacognosy and Biomaterials, Faculty of Pharmacy, Poznan University of Medical Sciences, 3 Rokietnicka St., 60-806 Poznan, Poland

<sup>2</sup> Department of Chemical Technology of Drugs, Poznan University of Medical Sciences, 3 Rokietnicka St., 60-806 Poznan, Poland

\* Correspondence: jpiontek@ump.edu.pl; Tel.: +48-61-641-8395

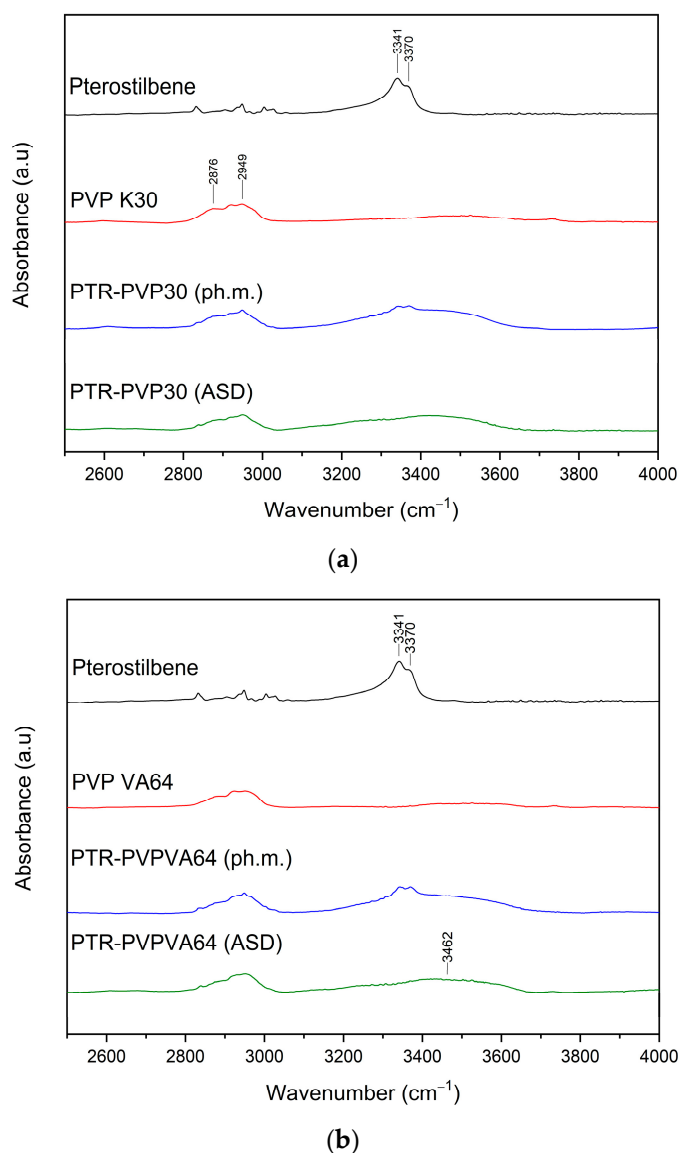

**Figure S1.** FTIR-ATR analysis, range 2550–4000 cm<sup>-1</sup>: **(a)** pterostilbene (black line), PVP K30 (red line), pterostilbene-PVP30 physical mixture (blue line), pterostilbene-PVP30 amorphous solid dispersion (green line); **(b)** pterostilbene (black line), PVP VA64 (red line), pterostilbene-PVPVA64 physical mixture (blue line), pterostilbene-PVP VA64 amorphous solid dispersion (green line).

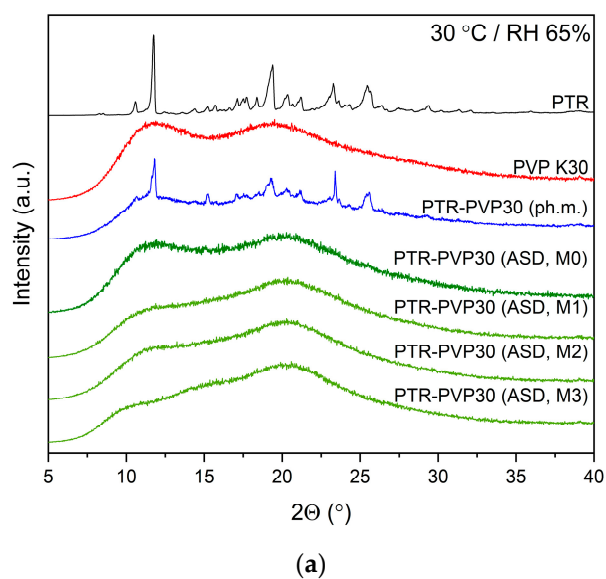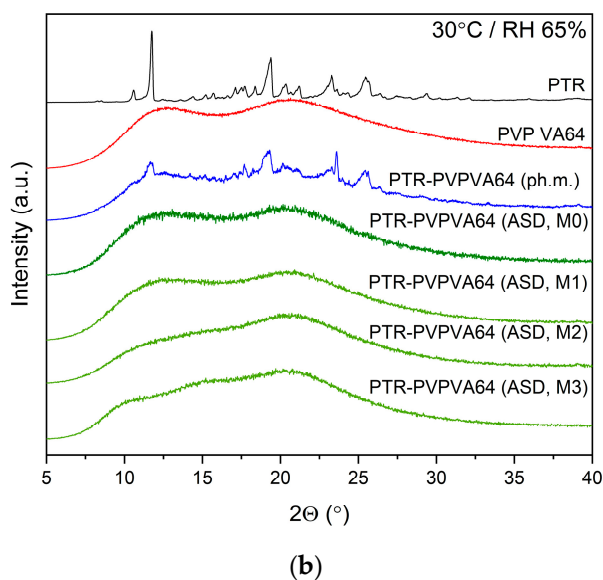

**Figure S2.** Physical stability studies (XRPD patterns, range 5–40°  $2\theta$ ): (a) pterostilbene (black line), PVP K30 (red line), pterostilbene-PVP30 physical mixture (blue line), pterostilbene-PVP30 amorphous solid dispersion (dark green line, M0), pterostilbene-PVP30 amorphous solid dispersion after 1–3 months (green line, M1–M3); (b) pterostilbene (black line), PVP VA64 (red line), pterostilbene-PVPVA64 physical mixture (blue line), pterostilbene-PVP VA64 amorphous solid dispersion (green line, M0), pterostilbene-PVPVA64 amorphous solid dispersion after 1–3 months (green line, M1–M3).

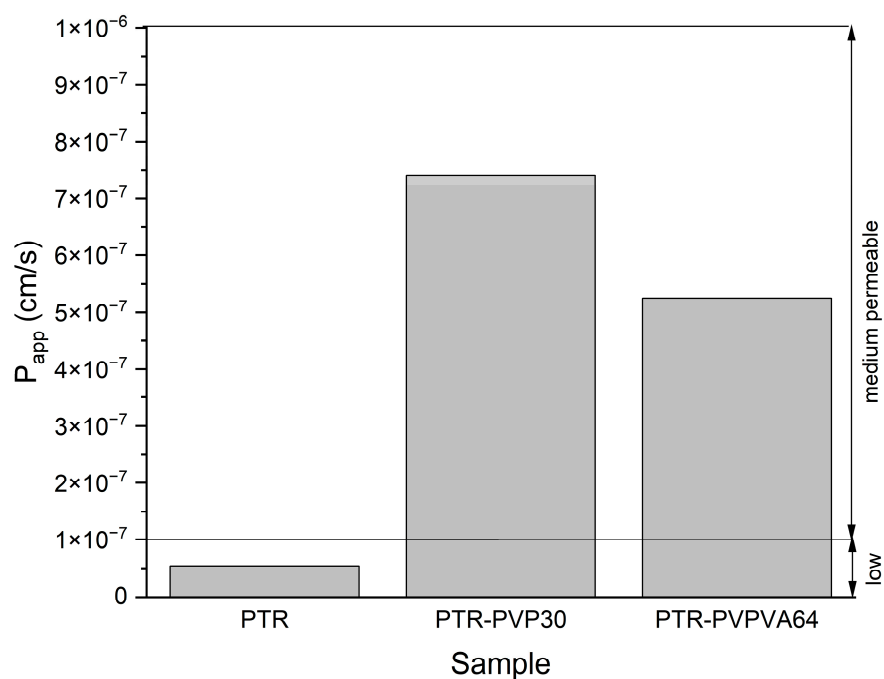

(a)

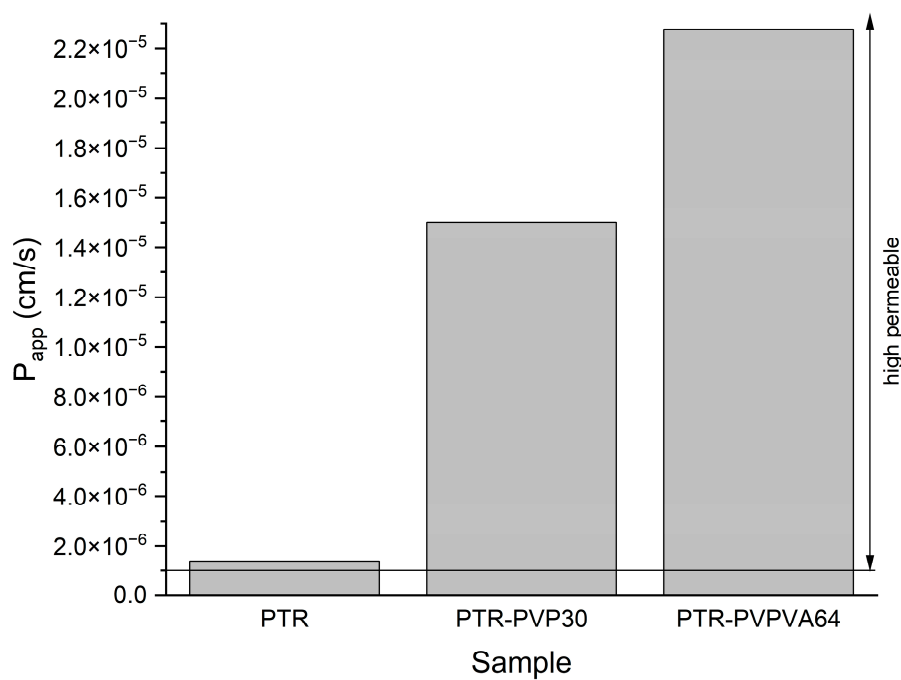

(b)

**Figure S3.** The results of PAMPA (a) GIT and (b) BBB assays. Legend: PTR – pterostilbene, PTR-PVP30 – amorphous solid dispersion of pterostilbene-PVP30, PTR-PVPVA64 – amorphous solid dispersion of pterostilbene-PVPVA64. Compounds designated as moderately permeable fall within the range of  $0.1 \times 10^{-6} \text{ cm} \cdot \text{s}^{-1} \leq P_{app} < 1 \times 10^{-6} \text{ cm} \cdot \text{s}^{-1}$ , while those with a  $P_{app}$  value  $\geq 1 \times 10^{-6} \text{ cm} \cdot \text{s}^{-1}$  are classified as highly permeable [1,2].

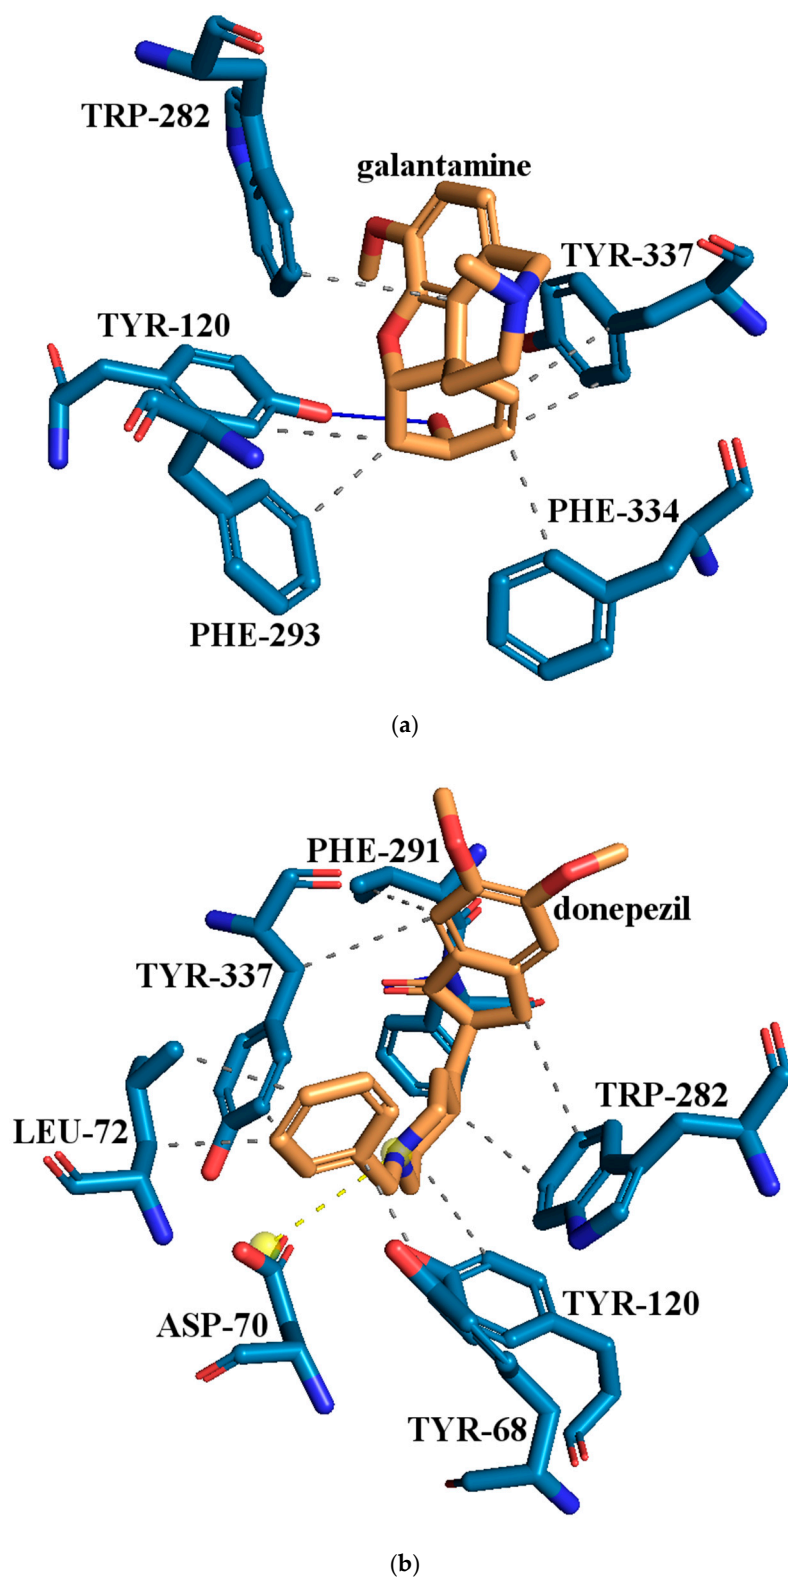

**Figure S4.** Proposed binding mode of positive control (a) galantamine (GAL), (b) donepezil (DON) with human acetylcholinesterase (AChE, PDB id: 4BDT). The key interactions of positive control with residues in the active sites of AChE. Legend: ASP - aspartic acid, LEU – leucine, PHE - phenylalanine, TRP - tryptophan, TYR - tyrosine, grey dashed line - hydrophobic interaction, blue solid line – hydrogen bond, yellow dashed line – salt-bridge.

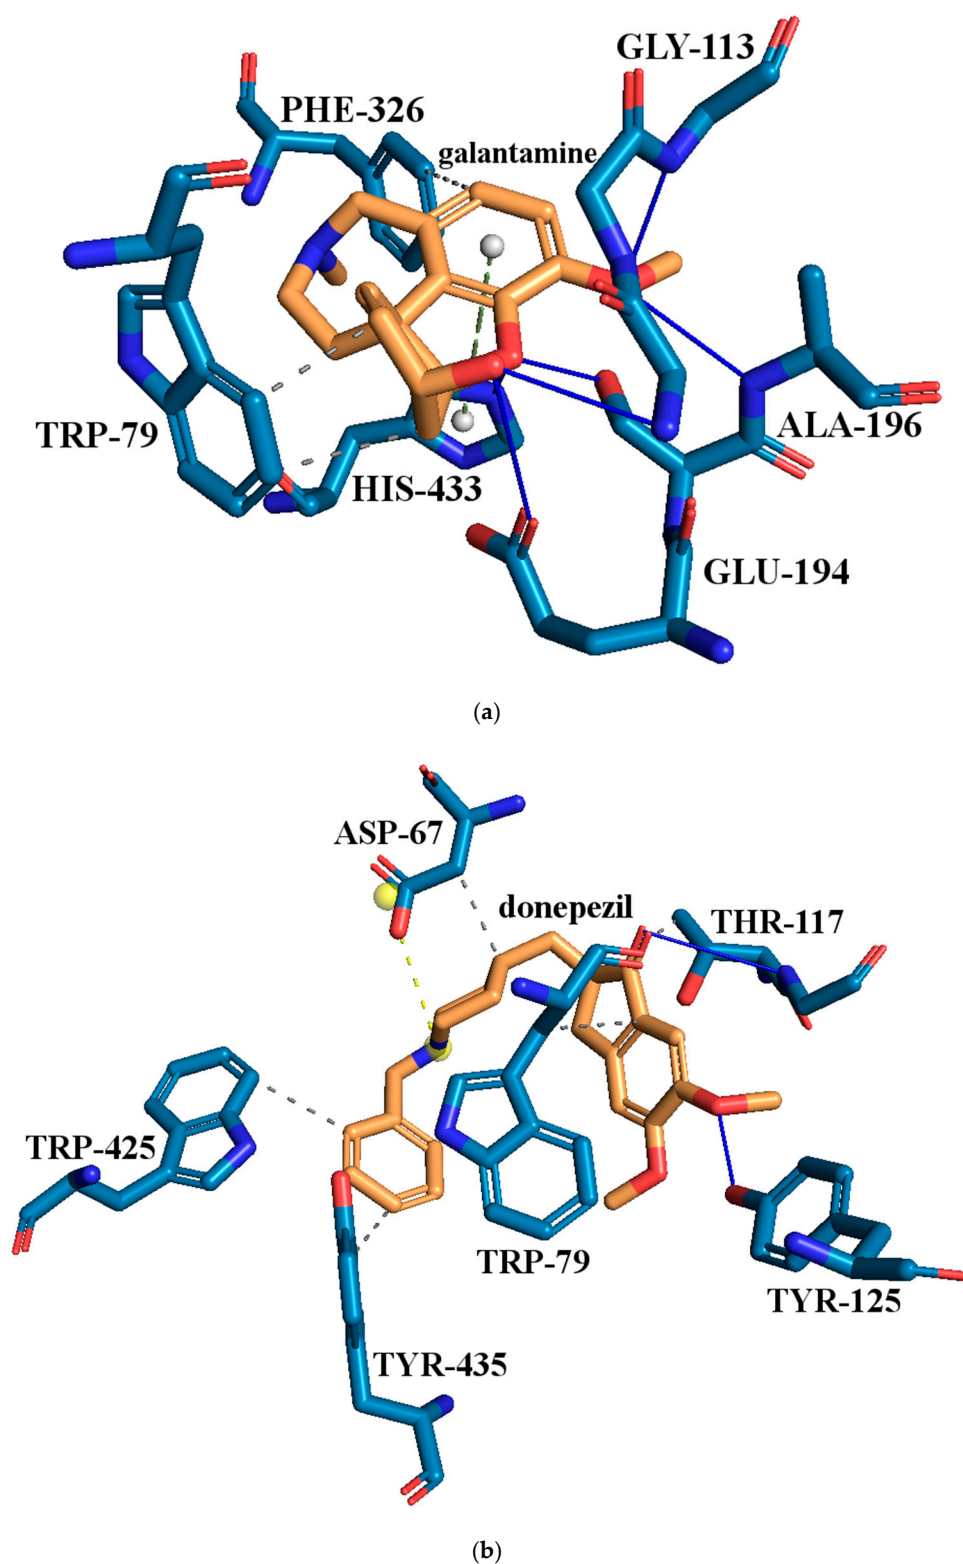

**Figure S5.** Proposed binding mode of positive control (a) galantamine (GAL), (b) donepezil (DON) with human butyrylcholinesterase (BChE, PDB id: 4BDS). The key interactions of positive control with residues in the active sites of BChE. Legend: ALA - alanine, ASP - aspartic acid, GLU - glutamic acid, GLY - glycine, HIS - histidine, PHE - phenylalanine, THR - threonine, TRP - tryptophan, TYR - tyrosine, grey dashed line - hydrophobic interaction, blue solid line - hydrogen bond, yellow dashed line - salt-bridge, green dashed line -  $\pi$ -stacking.

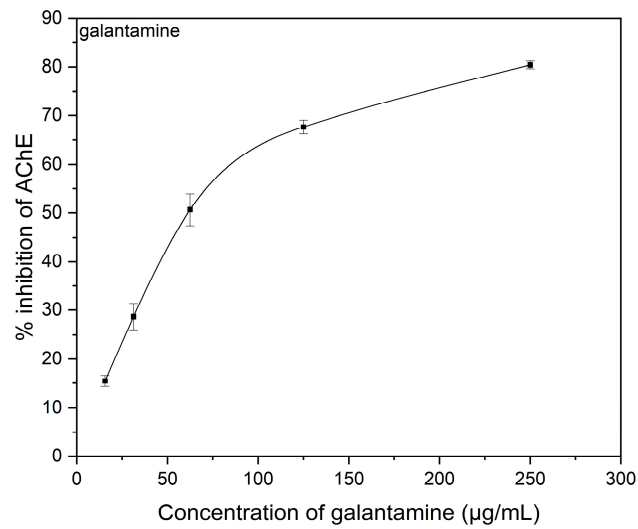

(a)

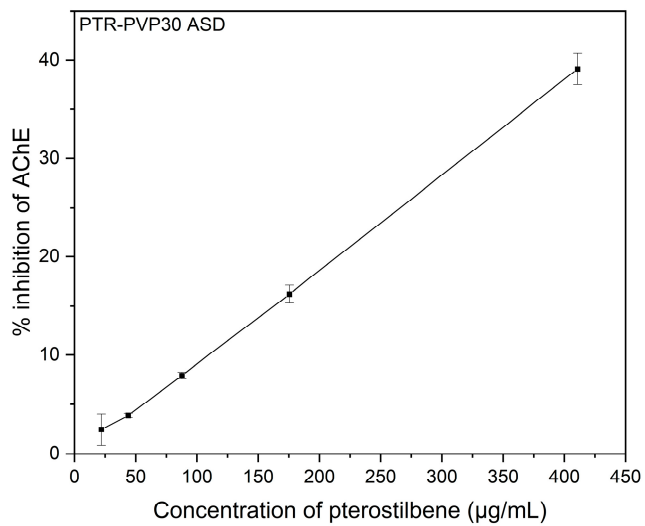

(b)

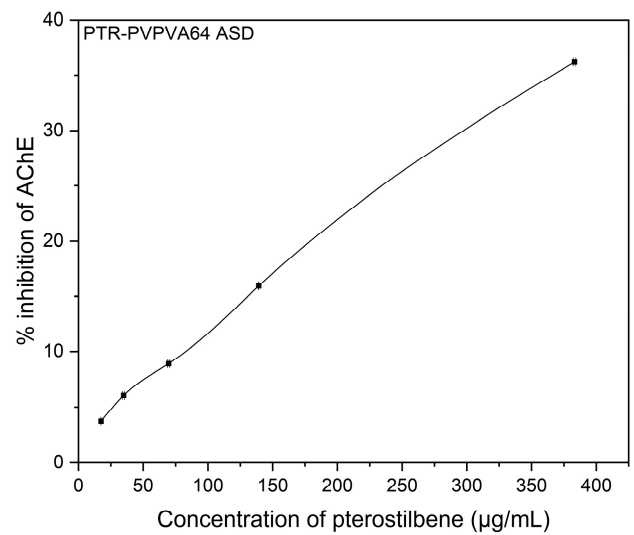

(c)

**Figure S6.** Acetylcholinesterase (AChE) inhibition dose-response curves of (a) galantamine, (b) pterostilbene in PTR-PVP30 amorphous solid dispersion (PTR-PVP30 ASD), and (c) pterostilbene in PTR-PVPVA64 amorphous solid dispersion (PTR-PVPVA64 ASD).

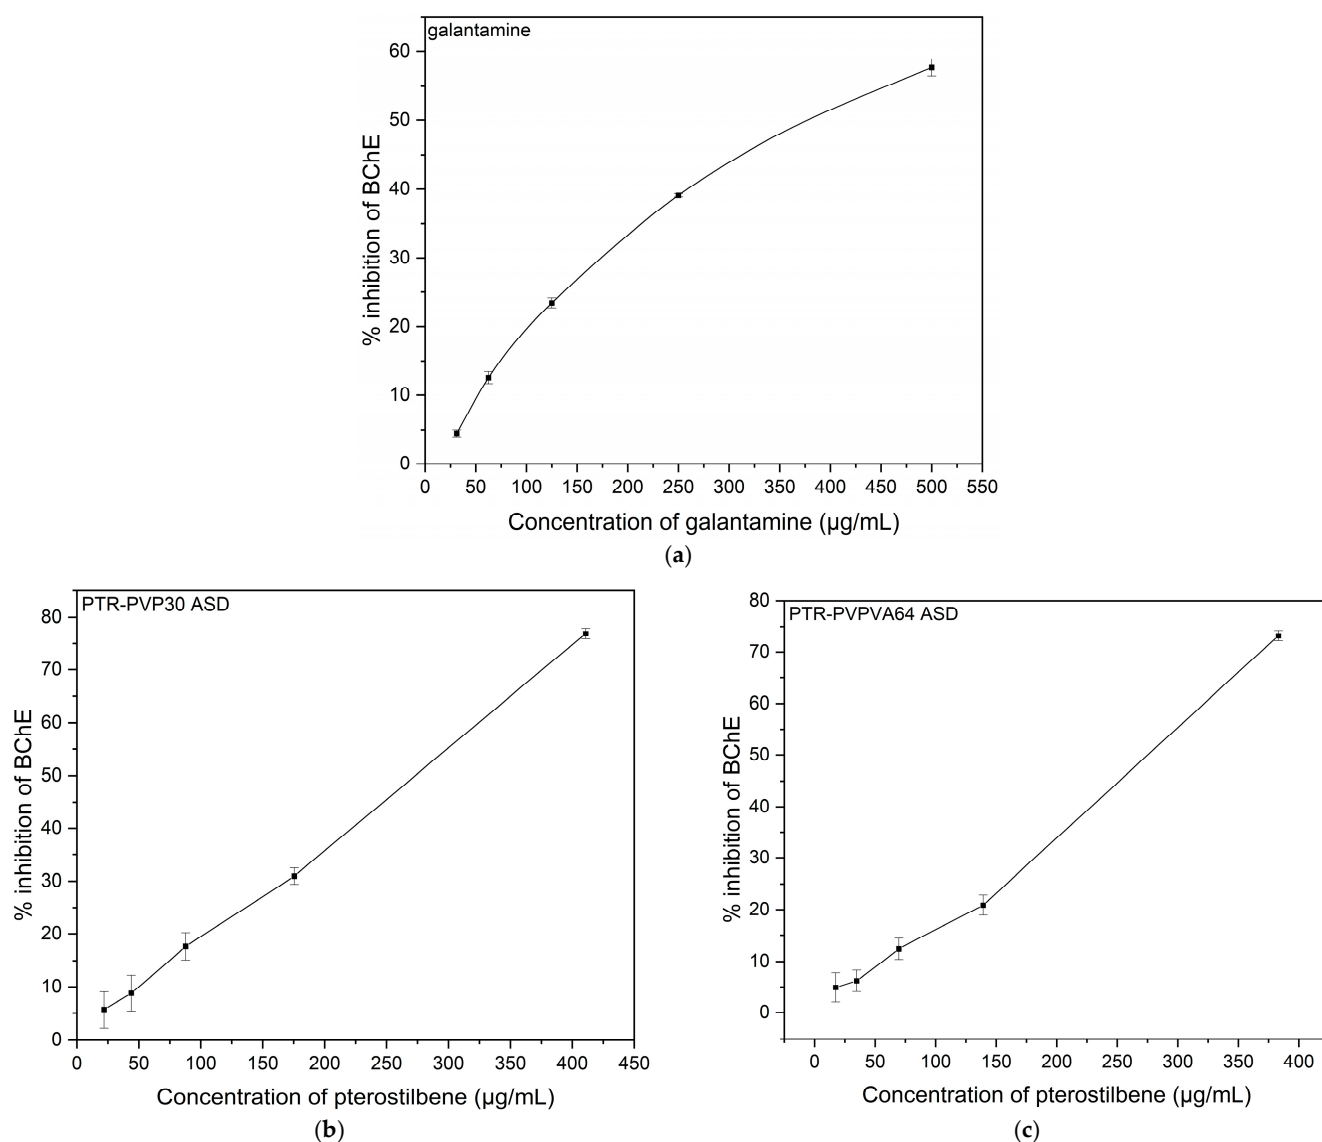

**Figure S7.** Butyrylcholinesterase (BChE) inhibition dose-response curves of (a) galantamine, (b) pterostilbene in PTR-PVP30 amorphous solid dispersion (PTR-PVP30 ASD), and (c) pterostilbene in PTR-PVPVA64 amorphous solid dispersion (PTR-PVPVA64 ASD).

**Table S1.** IC<sub>50</sub> values for activities towards acetylcholinesterase (AChE) and butyrylcholinesterase (BChE) for pterostilbene (PTR), PTR-PVP30 amorphous solid dispersion (PTR-PVP30 ASD), PTR-PVPVA64 amorphous solid dispersion (PTR-PVPVA64 ASD), galantamine, and donepezil.

|                 | AChE                     |                       | BChE                     |                       | Selectivity for   |                   |
|-----------------|--------------------------|-----------------------|--------------------------|-----------------------|-------------------|-------------------|
|                 | IC <sub>50</sub> (µg/mL) | IC <sub>50</sub> (nM) | IC <sub>50</sub> (µg/mL) | IC <sub>50</sub> (nM) | AChE <sup>a</sup> | BChE <sup>b</sup> |
| PTR             | none                     | none                  | none                     | none                  |                   |                   |
| PTR-PVP30 ASD   | 527.1±1.2                | 2056.6±4.6            | 268.0±3.5                | 1045.7±13.5           | 0.51              | 1.97              |
| PTR-PVPVA64 ASD | 540.8±3.8                | 2110.2±14.8           | 269.1±3.4                | 1050.0±13.2           | 0.50              | 2.01              |
| galantamine     | 66.3±3.9                 | 230.8±13.6            | 377.9±43.8               | 1315.2±152.4          | 5.70              | 0.18              |
| donepezil*      | 2.5                      | 6.7                   | 2808.2                   | 7400                  | 1104.47           | 0.0009            |

\* - donepezil IC<sub>50</sub> values based on literature report [3]; a - selectivity for AChE was defined as IC<sub>50</sub>(BChE)/IC<sub>50</sub>(AChE); b - selectivity for BChE was defined as IC<sub>50</sub>(AChE)/IC<sub>50</sub>(BChE).

## References

1. Fischer, H.; Kansy, M.; Avdeef, A.; Senner, F. Permeation of permanently positive charged molecules through artificial membranes—influence of physico-chemical properties. *Eur. J. Pharm. Sci.* 2007, 31, 32–42, doi:10.1016/j.ejps.2007.02.001.
2. Garbiec, E.; Rosiak, N.; Zalewski, P.; Tajber, L.; Cielecka-Piontek, J. Genistein Co-Amorphous Systems with Amino Acids: An Investigation into Enhanced Solubility and Biological Activity. *Pharmaceutics* 2023, 15, 2653, doi:10.3390/pharmaceutics15122653.
3. Sugimoto, H.; Ogura, H.; Arai, Y.; Iimura, Y.; Yamanishi, Y. Research and development of donepezil hydrochloride, a new type of acetylcholinesterase inhibitor. *Jpn. J. Pharmacol.* 2002, 89, 7–20.
